# Supplementary material for: Isolation and Insecticidal Activity of Essential Oil from Artemisia lavandulaefolia DC. against Plutella xylostella
Source: MDPI journal article supplement (doi:10.3390/toxins13120842), 2021-11-25
Supplement: s1 [file s1]

Supplementary Information

# Isolation and Insecticidal Activity of Essential Oil from *Artemisia lavandulaefolia* DC. against *Plutella xylostella*

Xing Huang, Yulin Huang, Chunyue Yang, Tiantian Liu, Xing Liu and Haibin Yuan \*

College of Plant Protection, Jilin Agricultural University, Changchun 130118, China; huangxing@jlau.edu.cn (X.H.); huangyulin0208@163.com (Y.H.); y319915876@163.com (C.Y.); ltt15944890963@163.com (T.L.); LX1065610622@163.com (X.L.)

\* Correspondence: yuanhaibin@jlau.edu.cn; Tel.: +0431-84333719

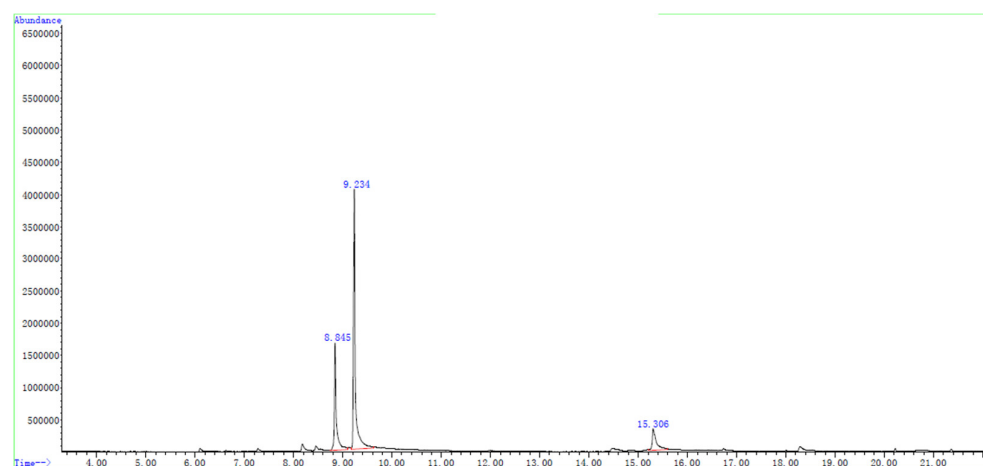

**Figure S1.** Total ion current chromatogram of Zh distillate of essential oil from *A. lavandulaefolia*.

**Table S1.** The main chemical constituents and relative contents of Zh distillate of essential oil from *A. lavandulaefolia*.

|   | Retention<br>No. Time<br>(min) | Name of Constituent                                  | Molecular<br>Formula                           | Number<br>of CAS | Relative<br>Content<br>(%) |
|---|--------------------------------|------------------------------------------------------|------------------------------------------------|------------------|----------------------------|
| 1 | 6.622                          | Eucalyptol                                           | C <sub>10</sub> H <sub>18</sub> O              | 470-82-6         | 57.13                      |
| 2 | 6.672                          | Cyclohexanol, 1-methyl-4-(1-methylethenyl)-, acetate | C <sub>12</sub> H <sub>20</sub> O <sub>2</sub> | 10198-23-9       | 32.45                      |
| 3 | 8.328                          | Bicyclo[2.2.1]heptan-2-one, 1,7,7-trimethyl-, (1S)-  | C <sub>10</sub> H <sub>16</sub> O              | 464-48-2         | 10.42                      |

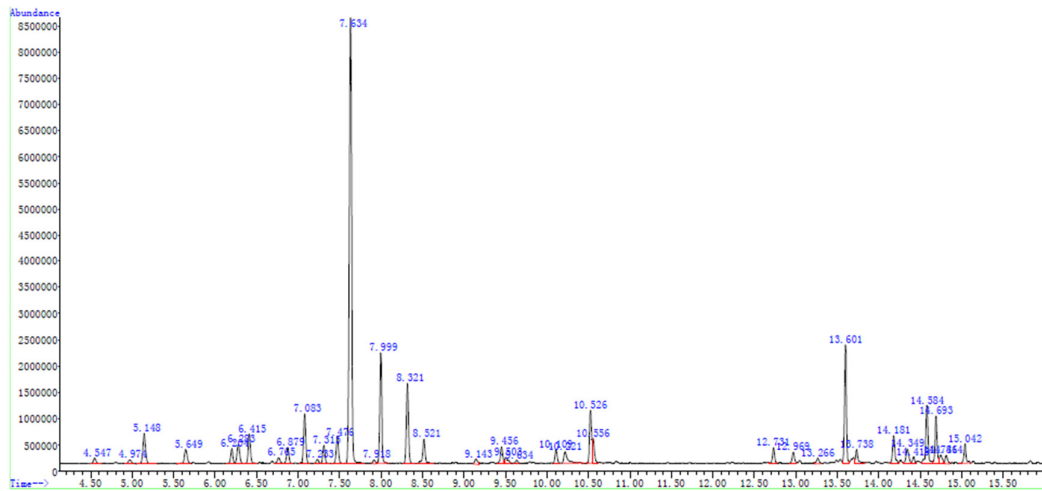

Figure S2. Total ion current chromatogram of Zb1 distillate of essential oil from *A. lavandulaefolia*.

Table S2. The main chemical constituents and relative contents of Zb1 distillate of essential oil from *A. lavandulaefolia*.

| No. | Retention Time (min) | Name of Constituent                                                                                  | Molecular Formula                             | Number of CAS | Relative Content (%) |
|-----|----------------------|------------------------------------------------------------------------------------------------------|-----------------------------------------------|---------------|----------------------|
| 1   | 5.150                | 1R- $\beta$ -Pinene                                                                                  | C <sub>10</sub> H <sub>16</sub>               | 7785-70-8     | 2.69                 |
| 2   | 6.286                | $\beta$ -Pinene                                                                                      | C <sub>10</sub> H <sub>16</sub>               | 127-91-3      | 1.57                 |
| 3   | 6.417                | $\beta$ -Myrcene                                                                                     | C <sub>10</sub> H <sub>16</sub>               | 123-35-3      | 2.02                 |
| 4   | 7.082                | 1,3-Cyclohexadiene,1-methyl-4-(1-methylethyl)-                                                       | C <sub>10</sub> H <sub>16</sub>               | 99-86-5       | 3.36                 |
| 5   | 7.476                | $\beta$ -Phellandrene                                                                                | C <sub>10</sub> H <sub>16</sub>               | 555-10-2      | 1.88                 |
| 6   | 7.630                | 1,5-Heptadien-4-one,3,3,6-trimethyl-                                                                 | C <sub>10</sub> H <sub>16</sub> O             | 546-49-6      | 33.68                |
| 7   | 8.001                | 1,4-Cyclohexadiene,1-methyl-4-(1-methylethyl)-                                                       | C <sub>10</sub> H <sub>16</sub>               | 99-85-4       | 6.98                 |
| 8   | 8.318                | Acetic acid, butyl ester                                                                             | C <sub>6</sub> H <sub>12</sub> O <sub>2</sub> | 123-86-4      | 5.14                 |
| 9   | 8.519                | Cyclohexene,1-methyl-4-(1-methylethylidene)-                                                         | C <sub>10</sub> H <sub>16</sub>               | 586-62-9      | 1.76                 |
| 10  | 10.528               | Bicyclo[2.2.1]heptan-2-one,1,7,7-trimethyl-, (1S)-                                                   | C <sub>10</sub> H <sub>16</sub> O             | 464-48-2      | 3.41                 |
| 11  | 13.604               | 3-Hydroxy-3-methylvaleric acid3-                                                                     | C <sub>6</sub> H <sub>12</sub> O <sub>3</sub> | 150-96-9      | 7.51                 |
| 12  | 14.183               | $\beta$ -Caryophyllene                                                                               | C <sub>15</sub> H <sub>24</sub>               | 6753-98-6     | 1.99                 |
| 13  | 14.585               | 1,6-Cyclodecadiene,1-methyl-5-methylene-8-(1-methylethyl)-,[s-(E,E)]-                                | C <sub>15</sub> H <sub>24</sub>               | 23986-74-5    | 4.18                 |
| 14  | 14.693               | Naphthalene,decahydro-4a-methyl-1-methylene-7-(1-methylethenyl)-,[4aR-(4a $\pi$ 7 $\pi$ 8a $\pi$ )]- | C <sub>15</sub> H <sub>24</sub>               | 17066-67-0    | 3.12                 |

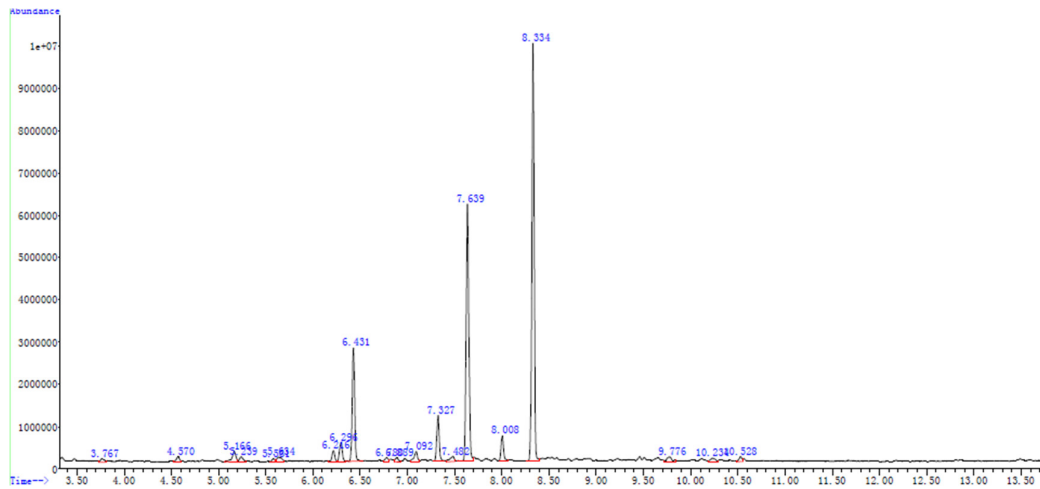

Figure S3. Total ion current chromatogram of Zb3 distillate of essential oil from *A. lavandulaefolia*.

Table S3. The main chemical constituents and relative contents of Zb3 distillate of essential oil from *A. lavandulaefolia*.

| No. | Retention Time (min) | Name of Constituent                             | Molecular Formula                              | Number of CAS | Relative Content (%) |
|-----|----------------------|-------------------------------------------------|------------------------------------------------|---------------|----------------------|
| 1   | 5.634                | Eucalyptol                                      | C <sub>10</sub> H <sub>18</sub> O              | 470-82-6      | 0.98                 |
| 2   | 6.430                | β-Myrcene                                       | C <sub>15</sub> H <sub>24</sub> O <sub>2</sub> | 123-35-3      | 11.02                |
| 3   | 7.326                | Limonene                                        | C <sub>15</sub> H <sub>24</sub> O <sub>2</sub> | 138-86-3      | 4.62                 |
| 4   | 7.643                | Benzene, 1-methyl-4-(1-methylethyl)-            | C <sub>10</sub> H <sub>14</sub>                | 99-87-6       | 27.65                |
| 5   | 8.006                | 1,4-Cyclohexadiene, 1-methyl-4-(1-methylethyl)- | C <sub>10</sub> H <sub>16</sub>                | 99-85-4       | 2.67                 |
| 6   | 8.338                | 1,5-Heptadien-4-one, 3,3,6-trimethyl            | C <sub>10</sub> H <sub>16</sub> O              | 546-49-6      | 39.23                |
| 7   | 9.775                | Caryophyllene oxide                             | C <sub>15</sub> H <sub>24</sub> O              | 1139-30-6     | 0.94                 |

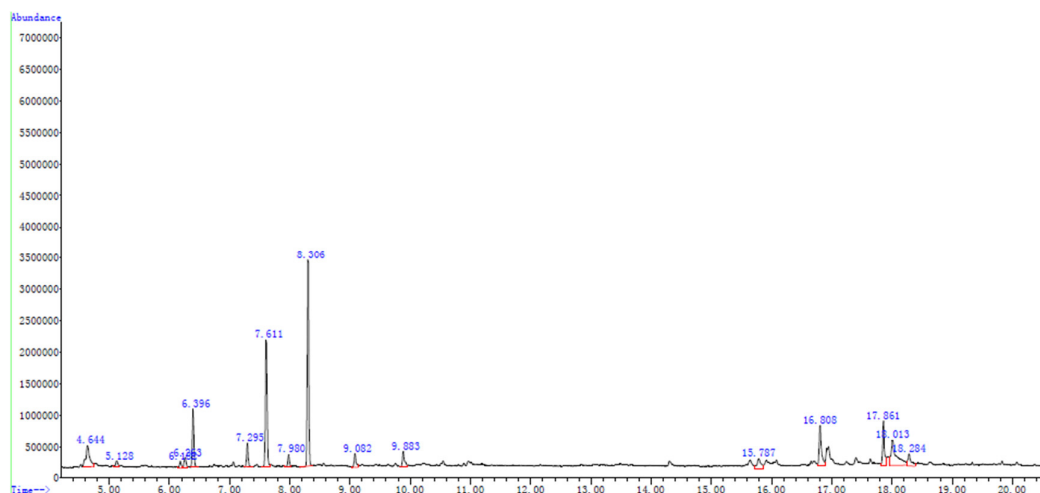

Figure S4. Total ion current chromatogram of the Zb4 distillate of essential oil from *A. lavandulaefolia*.

**Table S4.** The main chemical constituents and relative contents of Zb4 distillate of essential oil from *A. lavandulaefolia*.

| No. | Retention Time (min) | Name of Constituent                                                                 | Molecular Formula                              | Number of CAS | Relative Content (%) |
|-----|----------------------|-------------------------------------------------------------------------------------|------------------------------------------------|---------------|----------------------|
| 1   | 4.645                | 1-Pentanol, 4-methyl                                                                | C <sub>6</sub> H <sub>14</sub> O               | 626-89-1      | 6.65                 |
| 2   | 6.399                | β-Pinene                                                                            | C <sub>10</sub> H <sub>16</sub>                | 127-91-3      | 7.20                 |
| 3   | 7.612                | Benzene, 1-methyl-3-(1-methylethyl)-                                                | C <sub>10</sub> H <sub>14</sub>                | 535-77-3      | 17.66                |
| 4   | 8.307                | 1,5-Heptadien-4-one, 3,3,6-trimethyl                                                | C <sub>10</sub> H <sub>16</sub> O              | 546-49-6      | 24.63                |
| 5   | 16.807               | Limonen-6-ol, pivalate                                                              | C <sub>15</sub> H <sub>24</sub> O <sub>2</sub> | — —           | 7.34                 |
| 6   | 17.858               | Cycloundecene, 1-methyl                                                             | C <sub>12</sub> H <sub>22</sub>                | 88828-82-4    | 6.11                 |
| 7   | 18.013               | 5-Methoxy-2,2,6-trimethyl-1-(3-methyl-buta-1,3-dienyl)-7-oxa-bicyclo[4.1.0]heptanes | C <sub>15</sub> H <sub>24</sub> O <sub>2</sub> | — —           | 10.91                |
